# Supplementary material
Source: Research Square preprint supplement (doi:10.21203/rs.3.rs-8696663/v1)
Supplement: Supplementary file 1 [file aaa8d1b8aea4a4ddb4ad1ca4.docx]

**Additional file 1. Semi-structured interview guide**

Study: Barriers to Physical Activity in Patients with Diabetic Cardiomyopathy (DCM)

Purpose: To explore perceived barriers and motivators related to physical activity among older adults with DCM.

Note: Interviews were conducted in Chinese. This is an English translation of the finalized guide used in data collection.

**Opening script**

Thank you for agreeing to take part in this interview. We would like to understand your experiences and thoughts about physical activity/exercise after being diagnosed with diabetic cardiomyopathy. There are no right or wrong answers. Everything you share will be kept confidential and anonymized. You can skip any question or stop the interview at any time. With your permission, we will audio-record the interview to ensure accuracy.

**A. Understanding of diagnosis and illness perceptions (Capability: knowledge)**

1. Can you tell me what you understand about your heart condition (diabetic cardiomyopathy)?

• What did the doctor/nurse explain to you? What is still unclear?

2. How do you think this condition affects your daily life and physical functioning?

3. What concerns do you have about your condition now or in the future?

**B. Current physical activity and past experiences (Behavior)**

4. Before you were diagnosed, what kinds of physical activity or exercise did you usually do?

5. What physical activity do you do now (e.g., walking, housework, structured exercise)?

• How often, how long, and at what intensity?

6. Have your activity habits changed after the diagnosis? Why or why not?

**C. Perceived risks, symptoms, and fear of activity (Capability & Motivation)**

7. What do you feel in your body when you are physically active (e.g., fatigue, shortness of breath, palpitations, dizziness)?

8. Are you worried that exercise might worsen your symptoms or harm your heart? Can you describe your worries?

9. Have you ever had a bad experience related to activity (e.g., discomfort, fall, hypoglycemia)? How did it affect you?

10. What makes you decide to stop, slow down, or avoid activity?

**D. Motivation, goals, and emotions (Motivation)**

11. What benefits, if any, do you think physical activity could bring you?

12. What motivates you to be active? What reduces your motivation?

13. How do you feel emotionally when you think about exercising (e.g., confident, anxious, discouraged)?

14. What personal goals do you have that physical activity might help you achieve?

**E. Environmental and social influences (Opportunity)**

15. What factors in your environment make it easier or harder to be active (e.g., weather, space, safety, time, cost)?

16. How do your family members or friends view physical activity for you? How does their opinion influence you?

17. Have cultural beliefs or traditional health views affected how you think about exercise (e.g., ‘rest to conserve energy’)?

**F. Healthcare support and guidance (Opportunity & Capability)**

18. What advice have you received from healthcare professionals about physical activity/exercise?

• Was the advice specific (type, intensity, duration) or general? Was it helpful?

19. Do you know how to judge a ‘safe’ level of activity for yourself? What information would you like to have?

20. Have you ever participated in a cardiac rehabilitation or exercise program? If not, what prevented you?

**G. Needs and suggestions (Intervention ideas)**

21. What kind of support would help you increase physical activity safely (e.g., tailored plan, monitoring, education, family involvement)?

22. If a program were offered, what format would you prefer (hospital-based, home-based, community-based, online/remote)? Why?

23. Is there anything else you would like to share about your experience with physical activity and DCM?

**Closing**

Thank you for sharing your experiences. Do you have any questions for us?
